# Supplementary material for: Do Dietary Supplements Affect Inflammation, Oxidative Stress, and Antioxidant Status in Adults with Hypothyroidism or Hashimoto’s Disease?—A Systematic Review of Controlled Trials
Source: MDPI journal article supplement (doi:10.3390/antiox12101798), 2023-09-24
Supplement: s1 [file s1]

**Table S1.** Literature searching strategy

| Search number | Search term                                                                                                                                                                                                                                                                                                                                                                                                                                                                                                                                                                                                                                                                                                                                                                                                                                                                                                                                                                                                                                                                                                                                                                                        | PubMed    | Scopus    | Web of Science |
|---------------|----------------------------------------------------------------------------------------------------------------------------------------------------------------------------------------------------------------------------------------------------------------------------------------------------------------------------------------------------------------------------------------------------------------------------------------------------------------------------------------------------------------------------------------------------------------------------------------------------------------------------------------------------------------------------------------------------------------------------------------------------------------------------------------------------------------------------------------------------------------------------------------------------------------------------------------------------------------------------------------------------------------------------------------------------------------------------------------------------------------------------------------------------------------------------------------------------|-----------|-----------|----------------|
| #1            | (hypothyroid) OR (hypothyroidism) OR (autoimmune thyroiditis) OR (Hashimoto's)                                                                                                                                                                                                                                                                                                                                                                                                                                                                                                                                                                                                                                                                                                                                                                                                                                                                                                                                                                                                                                                                                                                     | 106,155   | 104,997   | 49,124         |
| #2            | (vitamin) OR (mineral) OR (vitamin A) OR (retinol) OR (carotenoid) OR (beta-carotene) OR ( $\beta$ -carotene) OR (vitamin B1) OR (thiamine) OR (vitamin B2) OR (riboflavin) OR (vitamin B3) OR (niacin) OR (nicotinic acid) OR (nicotinamide) OR (vitamin B5) OR (pantothenic acid) OR (vitamin B6) OR (pyridoxine) OR (pyridoxal) OR (pyridoxamine) OR (vitamin B7) OR (biotin) OR (vitamin B9) OR (folate) OR (folic acid) OR (vitamin B12) OR (cobalamin) OR (B-complex) OR (B complex) OR (vitamin C) OR (ascorbic acid) OR (vitamin D) OR (cholecalciferol) OR (vitamin E) OR (alpha-tocopherol) OR ( $\alpha$ -tocopherol) OR (vitamin K) OR (phylloquinone) OR (menaquinones) OR (multivitamin) OR (calcium) OR (magnesium) OR (iron) OR (zinc) OR (iodine) OR (selenium) OR (multimineral) OR (dietary supplements) OR (supplementation) OR (omega-3) OR (probiotic) OR (symbiotic) OR (myo-inositol) OR (inositol) OR (coenzyme Q10) OR (alpha lipoic acid) OR (DHA) OR (docosahexaenoic acid) OR (EPA) OR (eicosapentaenoic acid)                                                                                                                                                        | 2,538,234 | 5,530,956 | 3,626,179      |
| #3            | (inflammation) OR (oxidative stress) OR (DNA damage) OR (antioxidant capacity) OR (antioxidant status) OR (albumin) OR (interleukine) OR (NADPH oxidase) OR (leptin) OR (proinflammatory cytokines) OR (cytokine) OR (ROS) OR (reactive oxygen species) OR (adipocytokine) OR (serum inflammatory markers) OR (CRP) OR (C reactive protein) OR (neutrophil/lymphocyte ratio) OR (tumor necrosis factor- $\alpha$ ) OR (tumor necrosis factor) OR (TNF- $\alpha$ ) OR (TNF) OR (interleukin-6) OR (IL-6) OR (interleukin-12) OR (IL-12) OR (interleukin-4) OR (IL-4) OR (8-epi-PGF2a) OR (hsCRP) OR (interleukin-10) OR (IL-10) OR (interleukin-8) OR (IL-8) OR (interleukin-13) OR (IL-13) OR (interleukin-2) OR (IL-2) OR (interleukine-1B) OR (IL-1B) OR (interleukine-5) OR (IL-5) OR (interleukine-17) OR (IL-17) OR (interferon gamma) OR (IFN) OR (lipid peroxidation) OR (protein oxidation) OR (catalase) OR (glutathione peroxidase) OR (GPx) OR (glutathione reductase) OR (GR) OR (SOD) OR (superoxide dismutase) OR (isoprostanes) OR (F2-isoprostanes) OR (F2-IsoPs) OR (neuroprostanes) OR (protein carbonyl) OR (MDA) OR (malondialdehyde) OR (8-hydroxydeoxyguanosine) OR (8-OHdG) | 3,123,163 | 3,424,621 | 2,658,335      |
| #4            | #1 AND #2 AND #3                                                                                                                                                                                                                                                                                                                                                                                                                                                                                                                                                                                                                                                                                                                                                                                                                                                                                                                                                                                                                                                                                                                                                                                   | 1827      | 3004      | 911            |

**Table S2.** Results of the quality assessment of randomised studies using the CASP Randomised Controlled Trial Standard Checklist [23] - Sections A and B

| Authors, year            | Section A: Is the basic study design valid for a randomised controlled trial? |                                                                 |                                                                              | Section B: Was the study methodologically sound?               |                                                                                      |                                                          |                                                                                |                                                                                                                                     |
|--------------------------|-------------------------------------------------------------------------------|-----------------------------------------------------------------|------------------------------------------------------------------------------|----------------------------------------------------------------|--------------------------------------------------------------------------------------|----------------------------------------------------------|--------------------------------------------------------------------------------|-------------------------------------------------------------------------------------------------------------------------------------|
|                          | Did the study address a clearly focused research question?                    | Was the assignment of participants to interventions randomised? | Were all participants who entered the study accounted for at its conclusion? | Were the participants 'blind' to intervention they were given? | Were the investigators 'blind' to the intervention they were giving to participants? | Were the people assessing/analysing outcome/s 'blinded'? | Were the study groups similar at the start of the randomised controlled trial? | Apart from the experimental intervention, did each study group receive the same level of care (that is, were they treated equally)? |
| Anaraki et al., 2017     | Yes                                                                           | Yes                                                             | Yes                                                                          | Yes                                                            | Yes                                                                                  | Can't tell                                               | Yes                                                                            | Yes                                                                                                                                 |
| de Farias et al., 2015   | Yes                                                                           | Yes                                                             | No                                                                           | Yes                                                            | Yes                                                                                  | Can't tell                                               | Yes                                                                            | Yes                                                                                                                                 |
| Esposito et al., 2017    | Yes                                                                           | Yes                                                             | Can't tell                                                                   | Yes                                                            | Yes                                                                                  | Can't tell                                               | Yes                                                                            | Yes                                                                                                                                 |
| Farhangi & Tajmiri, 2020 | Yes                                                                           | Yes                                                             | Yes                                                                          | Yes                                                            | Yes                                                                                  | Can't tell                                               | Yes                                                                            | Yes                                                                                                                                 |
| Hu et al., 2021          | Yes                                                                           | Yes                                                             | Can't tell                                                                   | No                                                             | No                                                                                   | Can't tell                                               | Yes                                                                            | Yes                                                                                                                                 |
| Karanikas et al., 2008   | Yes                                                                           | Yes                                                             | Can't tell                                                                   | Yes                                                            | No                                                                                   | No                                                       | Yes                                                                            | Yes                                                                                                                                 |
| Krysiak & Okopień, 2011  | Yes                                                                           | Yes                                                             | Yes                                                                          | Yes                                                            | Yes                                                                                  | Yes                                                      | Yes                                                                            | Yes                                                                                                                                 |
| Nodehi et al., 2019      | Yes                                                                           | Yes                                                             | Yes                                                                          | Yes                                                            | Yes                                                                                  | Can't tell                                               | Yes                                                                            | Yes                                                                                                                                 |
| Pilli et al., 2015       | Yes                                                                           | Yes                                                             | Can't tell                                                                   | Yes                                                            | Can't tell                                                                           | Can't tell                                               | Yes                                                                            | Yes                                                                                                                                 |
| Preda et al., 2017       | Yes                                                                           | Yes                                                             | Yes                                                                          | Can't tell                                                     | Can't tell                                                                           | Can't tell                                               | Yes                                                                            | Can't tell                                                                                                                          |
| Rabbani et al., 2021     | Yes                                                                           | Yes                                                             | Yes                                                                          | Yes                                                            | Yes                                                                                  | Can't tell                                               | Yes                                                                            | Can't tell                                                                                                                          |
| Robat-Jazi et al., 2022  | Yes                                                                           | Yes                                                             | Can't tell                                                                   | Yes                                                            | Yes                                                                                  | Can't tell                                               | Yes                                                                            | Can't tell                                                                                                                          |
| Sun et al., 2021         | Yes                                                                           | Yes                                                             | No                                                                           | Can't tell                                                     | Can't tell                                                                           | Can't tell                                               | Yes                                                                            | No                                                                                                                                  |
| Talebi et al., 2020      | Yes                                                                           | Yes                                                             | Yes                                                                          | Yes                                                            | Yes                                                                                  | Yes                                                      | Yes                                                                            | Yes                                                                                                                                 |
| Tian et al., 2020        | Yes                                                                           | Yes                                                             | Yes                                                                          | Can't tell                                                     | Can't tell                                                                           | Can't tell                                               | Yes                                                                            | Yes                                                                                                                                 |
| Wang et al., 2018        | Yes                                                                           | Yes                                                             | No                                                                           | Yes                                                            | Yes                                                                                  | Can't tell                                               | Yes                                                                            | No                                                                                                                                  |
| Xiang et al., 2010       | Yes                                                                           | Yes                                                             | Yes                                                                          | Can't tell                                                     | Can't tell                                                                           | Can't tell                                               | Yes                                                                            | No                                                                                                                                  |
| Yu et al., 2017          | Yes                                                                           | Yes                                                             | Yes                                                                          | Yes                                                            | Yes                                                                                  | Can't tell                                               | Yes                                                                            | Yes                                                                                                                                 |
| Zhang et al., 2017       | Yes                                                                           | Yes                                                             | No                                                                           | Yes                                                            | Yes                                                                                  | Can't tell                                               | Yes                                                                            | Yes                                                                                                                                 |

**Table S2.** *Continuation* - Sections C and D

[illegible]

**Table S3.** Results of the of the quality assessment of non-randomised studies with ROBINS-I [25]

| Bias domain                                        | Signalling questions                                                                                                                                                                                                                 | Chakrabarti et al., 2016 | Nordio & Basciani, 2015 | Tomella et al., 2014 |
|----------------------------------------------------|--------------------------------------------------------------------------------------------------------------------------------------------------------------------------------------------------------------------------------------|--------------------------|-------------------------|----------------------|
| Bias due to confounding                            | 1.1 Is there potential for confounding of the effect of intervention in this study? If N/PN to 1.1: the study can be considered to be at low risk of bias due to confounding and no further signalling questions need be considered. | No                       | No                      | No                   |
|                                                    | 1.4. Did the authors use an appropriate analysis method that controlled for all the important confounding domains?                                                                                                                   | Yes                      | No information          | Probably yes         |
|                                                    | 1.5. If Y/PY to 1.4: Were confounding domains that were controlled for measured validly and reliably by the variables available in this study?                                                                                       | Yes                      | No information          | Probably yes         |
|                                                    | 1.6. Did the authors control for any post-intervention variables that could have been affected by the intervention?                                                                                                                  | No                       | No information          | No                   |
|                                                    | 1.7. Did the authors use an appropriate analysis method that controlled for all the important confounding domains and for time-varying confounding?                                                                                  | Probably yes             | Probably yes            | Yes                  |
|                                                    | 1.8. If Y/PY to 1.7: Were confounding domains that were controlled for measured validly and reliably by the variables available in this study?                                                                                       | Yes                      | Probably yes            | Probably yes         |
| Risk of bias judgement                             |                                                                                                                                                                                                                                      | Low                      | Low                     | Low                  |
| Bias in selection of participants into the study   | 2.1. Was selection of participants into the study (or into the analysis) based on participant characteristics observed after the start of intervention?                                                                              | No                       | No                      | No                   |
|                                                    | 2.4. Do start of follow-up and start of intervention coincide for most participants?                                                                                                                                                 | Yes                      | Yes                     | Yes                  |
| Risk of bias judgement                             |                                                                                                                                                                                                                                      | Low                      | Low                     | Low                  |
| Bias in classification of interventions            | 3.1 Were intervention groups clearly defined?                                                                                                                                                                                        | Yes                      | Yes                     | Yes                  |
|                                                    | 3.2 Was the information used to define intervention groups recorded at the start of the intervention?                                                                                                                                | Yes                      | Yes                     | Yes                  |
|                                                    | 3.3 Could classification of intervention status have been affected by knowledge of the outcome or risk of the outcome?                                                                                                               | No                       | No information          | No information       |
| Risk of bias judgement                             |                                                                                                                                                                                                                                      | Low                      | Low                     | Low                  |
| Bias due to deviations from intended interventions | 4.1. Were there deviations from the intended intervention beyond what would be expected in usual practice?                                                                                                                           | No                       | No                      | No                   |
| Risk of bias judgement                             |                                                                                                                                                                                                                                      | Low                      | Low                     | Low                  |
| Bias due to missing data                           | 5.1 Were outcome data available for all, or nearly all, participants?                                                                                                                                                                | Yes                      | Yes                     | No information       |
|                                                    | 5.2 Were participants excluded due to missing data on intervention status?                                                                                                                                                           | No                       | No                      | No information       |
|                                                    | 5.3 Were participants excluded due to missing data on other variables needed for the analysis?                                                                                                                                       | No                       | No                      | No information       |
|                                                    | 5.4 If PN/N to 5.1, or Y/PY to 5.2 or 5.3: Are the proportion of participants and reasons for missing data similar across interventions?                                                                                             | -                        | -                       | No information       |
|                                                    | 5.5 If PN/N to 5.1, or Y/PY to 5.2 or 5.3: Is there evidence that results were robust to the presence of missing data?                                                                                                               | -                        | -                       | No information       |
| Risk of bias judgement                             |                                                                                                                                                                                                                                      | Low                      | Low                     | No information       |
| Bias in measurement of outcomes                    | 6.1 Could the outcome measure have been influenced by knowledge of the intervention received?                                                                                                                                        | Yes                      | Probably yes            | Probably yes         |

|                                          |                                                                                                |                 |                 |                 |
|------------------------------------------|------------------------------------------------------------------------------------------------|-----------------|-----------------|-----------------|
|                                          | 6.2 Were outcome assessors aware of the intervention received by study participants?           | Probably yes    | Yes             | Probably yes    |
|                                          | 6.3 Were the methods of outcome assessment comparable across intervention groups?              | Yes             | Yes             | Yes             |
|                                          | 6.4 Were any systematic errors in measurement of the outcome related to intervention received? | No information  | No information  | No information  |
| Risk of bias judgement                   |                                                                                                | Moderate        | Moderate        | Moderate        |
| Bias in selection of the reported result | Is the reported effect estimate likely to be selected, on the basis of the results, from...    |                 |                 |                 |
|                                          | 7.1. ... multiple outcome measurements within the outcome domain?                              | No              | No              | Probably no     |
|                                          | 7.2 ... multiple analyses of the intervention-outcome relationship?                            | No              | No              | No              |
|                                          | 7.3 ... different subgroups?                                                                   | No              | No              | No              |
| Risk of bias judgement                   |                                                                                                | Low             | Low             | Low             |
| <b>Overall bias</b>                      | <b>Risk of bias judgement</b>                                                                  | <b>Moderate</b> | <b>Moderate</b> | <b>Moderate</b> |
